# Supplementary material
Source: Springer Nature journal article supplement (http://www.springermedizin.de/resource/supplementary/12955_2004_146_MOESM1_ESM.pdf/9559778)

1a)

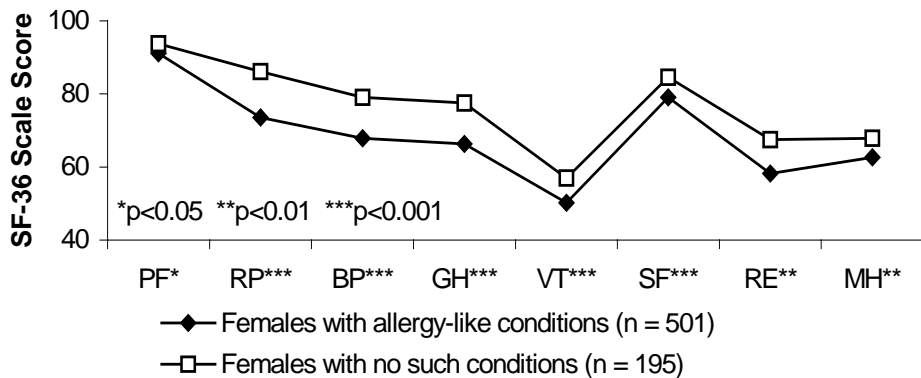

1b)

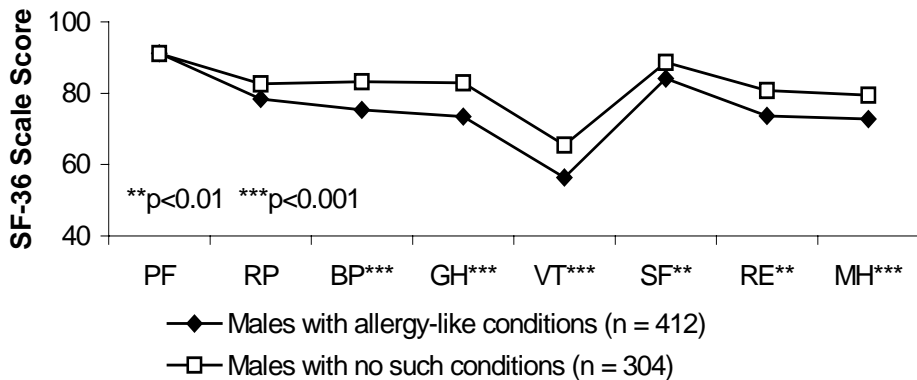

Supplement: MOESM1 [file 9559778]
